# Supplementary material
Source: PubMed Central journal article supplement (PMC4574232)
Supplement: supp_115.177956_177956SI.pdf [file supp_115.177956_177956SI.pdf]

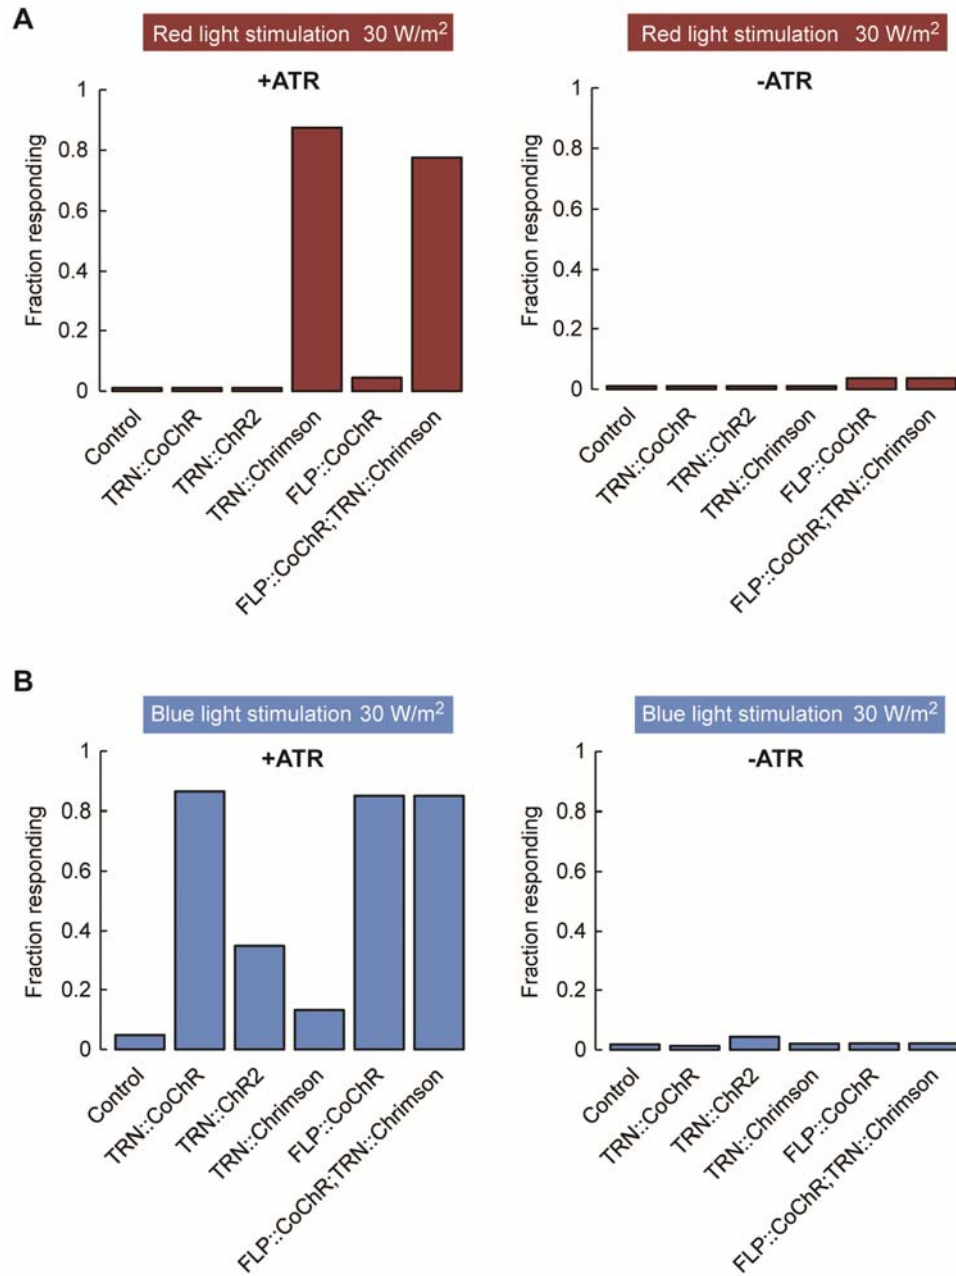

**Figure S1 All-trans-retinal (ATR) is required for light-evoked behavior in Chrimson and CoChR expressing animals**

(A, B) Backing behavior as in Figure 1B and C, in the presence (left panel) or the absence (right panel) of all-trans-retinal(ATR) in the growth medium; +ATR:  $n \geq 33$  animals; -ATR:  $n \geq 20$ .

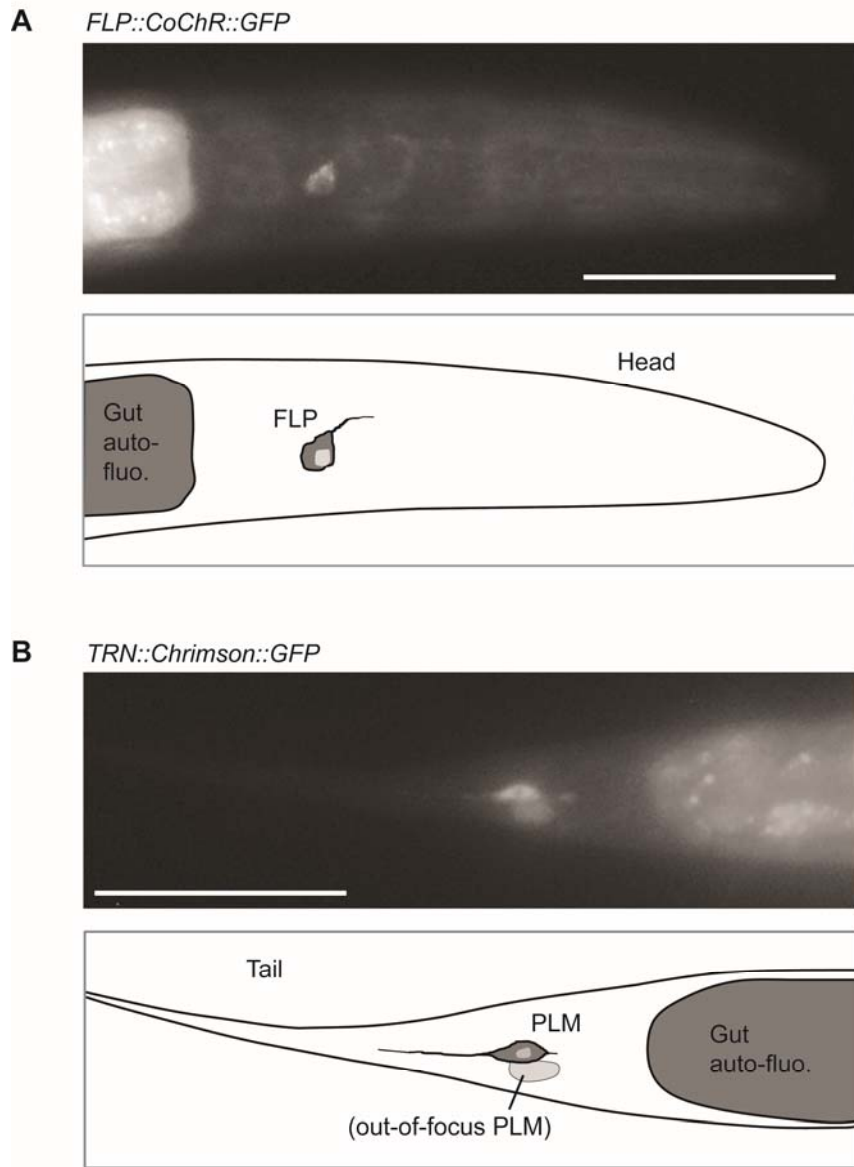

**Figure S2 Expression of Chrimson::GFP and CoChR::GFP**

(A, B) Representative fluorescence photomicrographs and corresponding schematic interpretations of transgenic animals expressing CoChR::GFP and Chrimson::GFP. Scale bars: 80  $\mu$ m

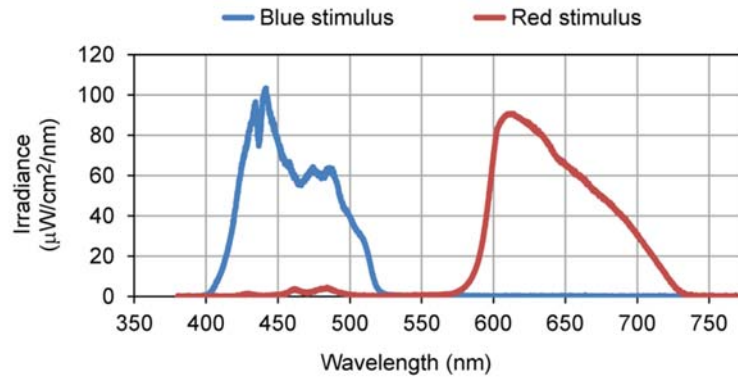

**Figure S3** Excitation spectra of blue and red light stimuli

Comparison of the excitation spectra of blue and red light stimuli used in this study.

**File S1**

**Blue light-evoked backing behavior in a *FLP::CoChR* animal**

The video shows the behavioral response of a *FLP::CoChR* animal crawling at the surface of a food-containing NGM plate and repeatedly stimulated with blue light.

Available for download as a .wmv file at [www.genetics.org/lookup/suppl/doi:10.1534/genetics.115.177956/-/DC1](http://www.genetics.org/lookup/suppl/doi:10.1534/genetics.115.177956/-/DC1)

**Table S1 Plasmids used in this study**

| <b>Plasmid</b> | <b>Description</b>                                                                                                                            |
|----------------|-----------------------------------------------------------------------------------------------------------------------------------------------|
| GH50           | GFP::unc-54UTR in slot3 Entry vector, gift from Erik Jorgensen                                                                                |
| pMH473         | unc-54UTR in slot3 Entry vector, gift from Mark Hammarlund                                                                                    |
| mg207          | pDEST_R4R3, gift from Miriam Goodman                                                                                                          |
| mg277          | SL2::mCherry::unc-54UTR in slot3 Entry vector, gift from Miriam Goodman                                                                       |
| dg9            | unc-122p::RFP                                                                                                                                 |
| dg68           | mec-3 promoter in slot1 Entry vector                                                                                                          |
| dg229          | QUAS promoter in slot1 Entry vector                                                                                                           |
| dg239          | mec-4 promoter (2kb) in slot1 Entry vector                                                                                                    |
| dg240          | QF in slot2 Entry vector                                                                                                                      |
| dg241          | QS in slot2 Entry vector                                                                                                                      |
| dg243          | [mec-3p::QF], generated by LR recombination between mg207, pMH473, dg68 and dg240                                                             |
| dg245          | [mec-4p::QS::SL2mCherry], generated by LR recombination between mg207, mg277, dg241, and mg239                                                |
| dg260          | [mec-4p::Chrimson::GFP], generated by LR recombination between mg207, GH50, mg239, and dg263                                                  |
| dg262          | [mec-4p::CoChR::GFP], generated by LR recombination between mg207, GH50, mg239, and dg265                                                     |
| dg263          | Chrimson, codon optimized and containing artificial introns in slot2 Entry vector, generated through gene synthesis in the pUC57-Kan backbone |
| dg264          | Chronos, codon optimized and containing artificial introns in slot2 Entry vector, generated through gene synthesis in the pUC57-Kan backbone  |
| dg265          | CoChR, codon optimized and containing artificial introns in slot2 Entry vector, generated through gene synthesis in the pUC57-Kan backbone    |
| dg276          | [QUAS::CoChR::GFP], generated by LR recombination between mg207, GH50, mg229, and dg265                                                       |

**Table S2 Strains used in this study**

| Strain name | Genotype                                                                                                            | Comment                                                                                                                                                                                                                                                          |
|-------------|---------------------------------------------------------------------------------------------------------------------|------------------------------------------------------------------------------------------------------------------------------------------------------------------------------------------------------------------------------------------------------------------|
| N2          | wild type                                                                                                           |                                                                                                                                                                                                                                                                  |
| KG1180      | <i>lite-1(ce314) X</i>                                                                                              | Mutant displaying no behavioral response to UV and intense blue light.                                                                                                                                                                                           |
| AQ2313      | <i>lJls123[mec-4p::Chr2 codon optimized; unc-122p::rfp]</i>                                                         | <i>TRN::Chr2</i>                                                                                                                                                                                                                                                 |
| DAG252-255  | <i>lite-1(ce314) X; domEx252-255[mec-4p::Chrimson::GFP, unc-122p::rfp]</i>                                          | <i>TRN::Chrimson</i><br>Injected plasmids: dg260 (20 ng/μl), dg9 (20 ng/μl).<br>We observed similar behavioral responses with all four independent lines and Figure 1 reports aggregated data.                                                                   |
| DAG260-263  | <i>lite-1(ce314) X; domEx260-263[mec-4p::CoChR::GFP, unc-122p::rfp]</i>                                             | <i>TRN::CoChR</i><br>Injected plasmids: dg262 (20 ng/μl), dg9 (20 ng/μl).<br>We observed similar behavioral responses with all four independent lines and Figure 1 reports aggregated data.                                                                      |
| DAG272      | <i>lite-1(ce314) X; domEx272[mec-3p::QF, mec-4p::QS, QUAS::CoChR::GFP, unc122p::RFP]</i>                            | <i>FLP::CoChR</i><br>Injected plasmids: dg243 (5 ng/μl), dg245 (40 ng/μl), dg276 (20 ng/μl), dg9 (20 ng/μl).                                                                                                                                                     |
| DAG342-344  | <i>lite-1(ce314) X; domEx342-344[mec-4p::Chrimson::GFP, mec-3p::QF, mec-4p::QS, QUAS::CoChR::GFP, unc122p::RFP]</i> | <i>FLP::CoChR; TRN::Chrimson</i><br>Injected plasmids: dg243 (5 ng/μl), dg245 (40 ng/μl), dg276 (20 ng/μl), dg260 (20 ng/μl), dg9 (20 ng/μl).<br>We observed similar behavioral responses with all three independent lines and Figure 2 reports aggregated data. |
| DAG355      | <i>lite-1(ce314) X; domIs355[mec-3p::QF, mec-4p::QS, QUAS::CoChR::GFP, unc122p::RFP]</i>                            | <i>FLP::CoChR</i><br>DAG272 was integrated and outcrossed twice with KG1180 <i>lite-1(ce314)</i> to produce DAG355.                                                                                                                                              |
| DAG356      | <i>domIs355[mec-3p::QF, mec-4p::QS, QUAS::CoChR::GFP, unc122p::RFP]</i>                                             | <i>FLP::CoChR</i><br>DAG355 was crossed with N2 to remove the <i>lite-1</i> mutation and create DAG356.                                                                                                                                                          |
