# Supplementary material
Source: PubMed Central journal article supplement (PMC4574232)
Supplement: supp_115.177956_FigureS1.pdf [file supp_115.177956_FigureS1.pdf]

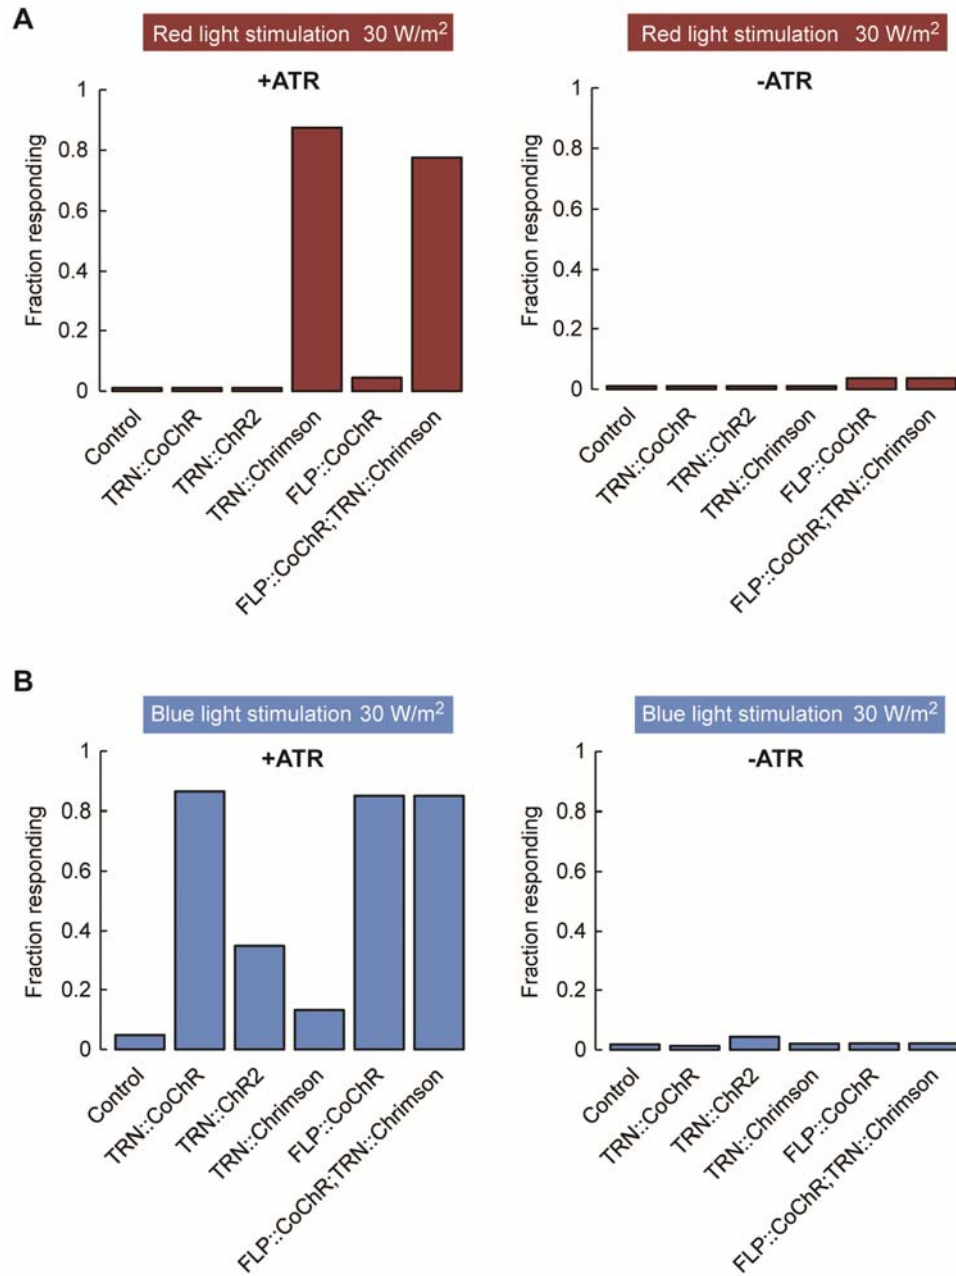

**Figure S1 All-trans-retinal (ATR) is required for light-evoked behavior in Chrimson and CoChR expressing animals**

(A, B) Backing behavior as in Figure 1B and C, in the presence (left panel) or the absence (right panel) of all-trans-retinal(ATR) in the growth medium; +ATR:  $n \geq 33$  animals; -ATR:  $n \geq 20$ .
