# Supplementary material
Source: PubMed Central journal article supplement (PMC4574232)
Supplement: supp_115.177956_FigureS2.pdf [file supp_115.177956_FigureS2.pdf]

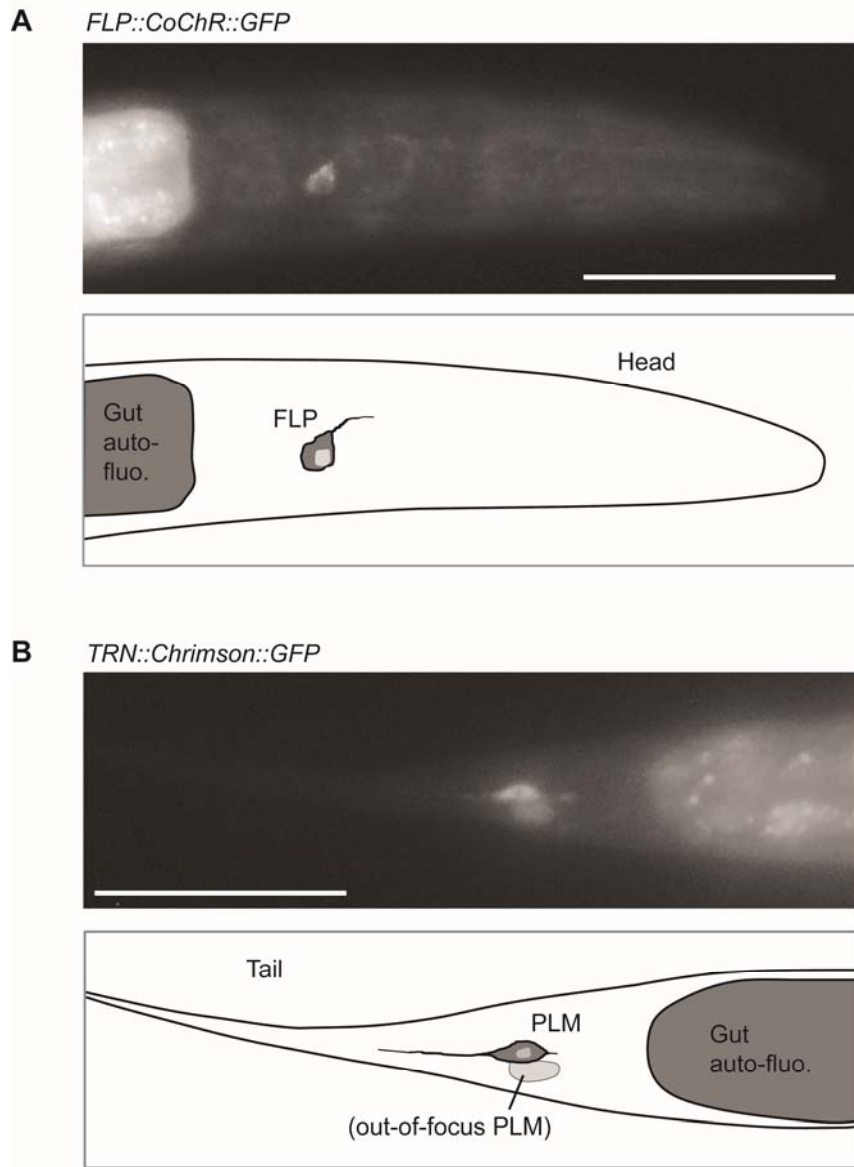

**Figure S2 Expression of Chrimson::GFP and CoChR::GFP**

(A, B) Representative fluorescence photomicrographs and corresponding schematic interpretations of transgenic animals expressing CoChR::GFP and Chrimson::GFP. Scale bars: 80  $\mu$ m
