# Supplementary material
Source: PubMed Central journal article supplement (PMC4574232)
Supplement: supp_115.177956_FigureS3.pdf [file supp_115.177956_FigureS3.pdf]

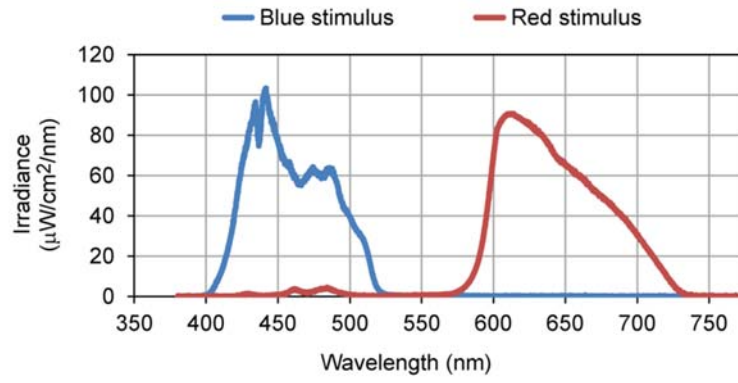

**Figure S3** Excitation spectra of blue and red light stimuli

Comparison of the excitation spectra of blue and red light stimuli used in this study.
