# Supplementary material
Source: PubMed Central journal article supplement (PMC4574232)
Supplement: supp_115.177956_TableS1.pdf [file supp_115.177956_TableS1.pdf]

**Table S1 Plasmids used in this study**

| <b>Plasmid</b> | <b>Description</b>                                                                                                                            |
|----------------|-----------------------------------------------------------------------------------------------------------------------------------------------|
| GH50           | GFP::unc-54UTR in slot3 Entry vector, gift from Erik Jorgensen                                                                                |
| pMH473         | unc-54UTR in slot3 Entry vector, gift from Mark Hammarlund                                                                                    |
| mg207          | pDEST_R4R3, gift from Miriam Goodman                                                                                                          |
| mg277          | SL2::mCherry::unc-54UTR in slot3 Entry vector, gift from Miriam Goodman                                                                       |
| dg9            | unc-122p::RFP                                                                                                                                 |
| dg68           | mec-3 promoter in slot1 Entry vector                                                                                                          |
| dg229          | QUAS promoter in slot1 Entry vector                                                                                                           |
| dg239          | mec-4 promoter (2kb) in slot1 Entry vector                                                                                                    |
| dg240          | QF in slot2 Entry vector                                                                                                                      |
| dg241          | QS in slot2 Entry vector                                                                                                                      |
| dg243          | [mec-3p::QF], generated by LR recombination between mg207, pMH473, dg68 and dg240                                                             |
| dg245          | [mec-4p::QS::SL2mCherry], generated by LR recombination between mg207, mg277, dg241, and mg239                                                |
| dg260          | [mec-4p::Chrimson::GFP], generated by LR recombination between mg207, GH50, mg239, and dg263                                                  |
| dg262          | [mec-4p::CoChR::GFP], generated by LR recombination between mg207, GH50, mg239, and dg265                                                     |
| dg263          | Chrimson, codon optimized and containing artificial introns in slot2 Entry vector, generated through gene synthesis in the pUC57-Kan backbone |
| dg264          | Chronos, codon optimized and containing artificial introns in slot2 Entry vector, generated through gene synthesis in the pUC57-Kan backbone  |
| dg265          | CoChR, codon optimized and containing artificial introns in slot2 Entry vector, generated through gene synthesis in the pUC57-Kan backbone    |
| dg276          | [QUAS::CoChR::GFP], generated by LR recombination between mg207, GH50, mg229, and dg265                                                       |
