# Supplementary material
Source: PubMed Central journal article supplement (PMC4574232)
Supplement: supp_115.177956_TableS2.pdf [file supp_115.177956_TableS2.pdf]

**Table S2 Strains used in this study**

| Strain name | Genotype                                                                                                            | Comment                                                                                                                                                                                                                                                          |
|-------------|---------------------------------------------------------------------------------------------------------------------|------------------------------------------------------------------------------------------------------------------------------------------------------------------------------------------------------------------------------------------------------------------|
| N2          | wild type                                                                                                           |                                                                                                                                                                                                                                                                  |
| KG1180      | <i>lite-1(ce314) X</i>                                                                                              | Mutant displaying no behavioral response to UV and intense blue light.                                                                                                                                                                                           |
| AQ2313      | <i>lJls123[mec-4p::Chr2 codon optimized; unc-122p::rfp]</i>                                                         | <i>TRN::Chr2</i>                                                                                                                                                                                                                                                 |
| DAG252-255  | <i>lite-1(ce314) X; domEx252-255[mec-4p::Chrimson::GFP, unc-122p::rfp]</i>                                          | <i>TRN::Chrimson</i><br>Injected plasmids: dg260 (20 ng/μl), dg9 (20 ng/μl).<br>We observed similar behavioral responses with all four independent lines and Figure 1 reports aggregated data.                                                                   |
| DAG260-263  | <i>lite-1(ce314) X; domEx260-263[mec-4p::CoChR::GFP, unc-122p::rfp]</i>                                             | <i>TRN::CoChR</i><br>Injected plasmids: dg262 (20 ng/μl), dg9 (20 ng/μl).<br>We observed similar behavioral responses with all four independent lines and Figure 1 reports aggregated data.                                                                      |
| DAG272      | <i>lite-1(ce314) X; domEx272[mec-3p::QF, mec-4p::QS, QUAS::CoChR::GFP, unc122p::RFP]</i>                            | <i>FLP::CoChR</i><br>Injected plasmids: dg243 (5 ng/μl), dg245 (40 ng/μl), dg276 (20 ng/μl), dg9 (20 ng/μl).                                                                                                                                                     |
| DAG342-344  | <i>lite-1(ce314) X; domEx342-344[mec-4p::Chrimson::GFP, mec-3p::QF, mec-4p::QS, QUAS::CoChR::GFP, unc122p::RFP]</i> | <i>FLP::CoChR; TRN::Chrimson</i><br>Injected plasmids: dg243 (5 ng/μl), dg245 (40 ng/μl), dg276 (20 ng/μl), dg260 (20 ng/μl), dg9 (20 ng/μl).<br>We observed similar behavioral responses with all three independent lines and Figure 2 reports aggregated data. |
| DAG355      | <i>lite-1(ce314) X; domIs355[mec-3p::QF, mec-4p::QS, QUAS::CoChR::GFP, unc122p::RFP]</i>                            | <i>FLP::CoChR</i><br>DAG272 was integrated and outcrossed twice with KG1180 <i>lite-1(ce314)</i> to produce DAG355.                                                                                                                                              |
| DAG356      | <i>domIs355[mec-3p::QF, mec-4p::QS, QUAS::CoChR::GFP, unc122p::RFP]</i>                                             | <i>FLP::CoChR</i><br>DAG355 was crossed with N2 to remove the <i>lite-1</i> mutation and create DAG356.                                                                                                                                                          |
